# Supplementary material for: Seismic amplitude response to internal heterogeneity of mass-transport deposits
Source: Copernicus journal article supplement (doi:10.5194/se-14-137-2023), 2023-02-22
Supplement: Supplementary file 1 [file se-14-137-2023-supplement.pdf]

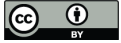

*Supplement of*

## **Seismic amplitude response to internal heterogeneity of mass-transport deposits**

**Jonathan Ford et al.**

*Correspondence to:* Jonathan Ford ([jford@ogs.it](mailto:jford@ogs.it))

The copyright of individual parts of the supplement might differ from the article licence.

## Contents of this file

1. Black Sea case study area additional data:
  - (a) Multi-sensor core logger (MSCL) data for four sediment cores (Fig. S1)
  - (b) Cone penetration test (CPT) data for site GH-T-PCPT7 (Fig. S2)
  - (c) Stacking velocity function from close to the alongslope sub-bottom profile (Fig. S3)
2. Synthetic modelling trace envelope results for all realisations:
  - (a) Single-source experiment (Fig. S4)
  - (b) Multi-source experiment (Fig. S5)
3. Model details and summary results for variations on the single-source synthetic experiment:
  - (a) 'Low-reflectivity' experiment (Table S1 and Fig. S10)
  - (b) 'High-reflectivity' experiment (Table S2 and Fig. S11)
  - (c) 'Far source' experiment (Table S3, Figs. S12 and S13)
  - (d) 'Low Poisson's ratio' experiment (Table S4 and Fig. S14)
  - (e) Cross-plot between the single-source synthetic experiment and experiments (a) to (d) of RMS amplitudes within the heterogeneous zone (Fig. S15)
4. Compute requirements for the synthetic modelling experiments (Table S5)

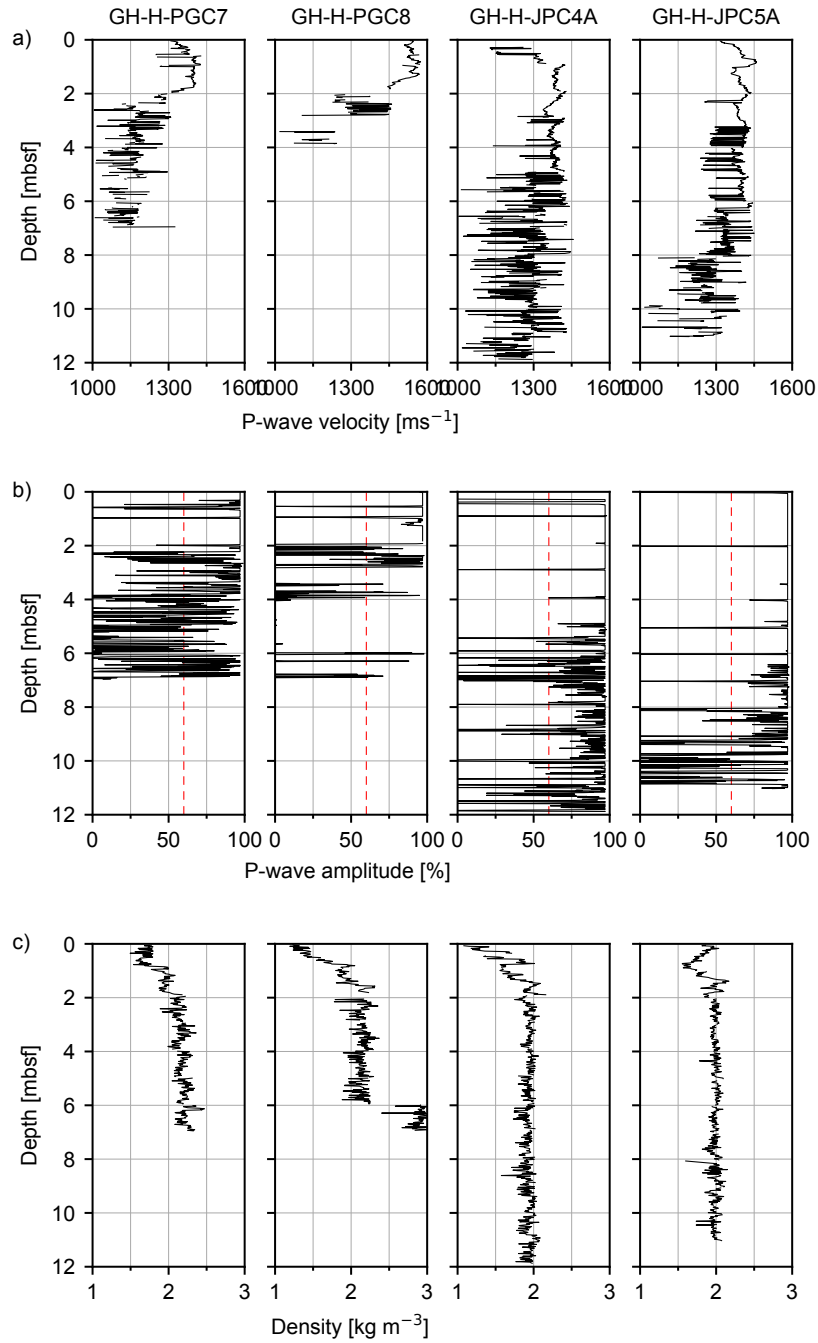

**Figure S1.** Multi-sensor core logger (MSCL) results from cores GH-H-PGC7, GH-H-PGC8, GH-H-JPC4A and GH-H-JPB5A. a) P-wave velocity, b) P-wave amplitude (60% cutoff marked), c) density, d) cross-plot of P-wave velocity and density logs, for depth intervals where the P-wave amplitude exceeds the 60% cutoff. Parameter distributions are used to derive geologically plausible P-impedance contrasts for the two component sediment lithologies used in the multi-source synthetic experiment (Section 3.2) (cont.)

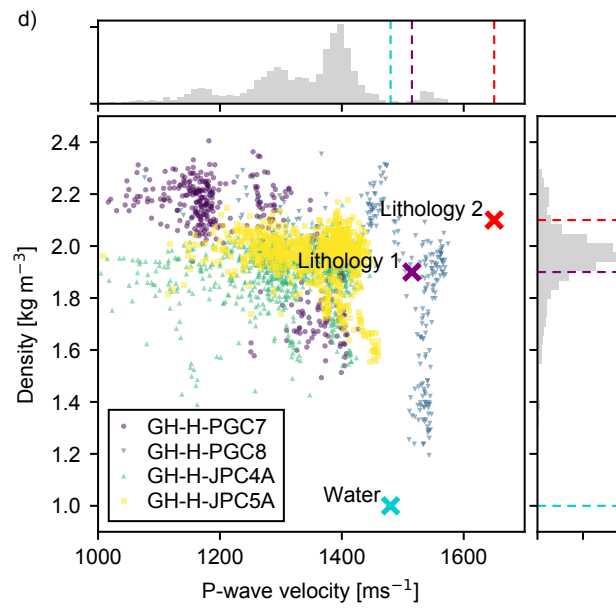

**Figure S1.**

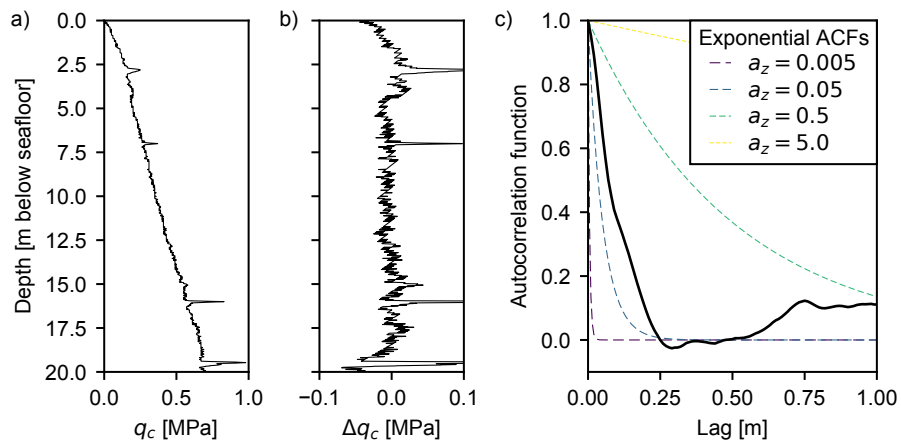

**Figure S2.** Cone-penetration test (CPT) results for site GH-T-PCPT7. a) Cone-tip resistance ( $q_c$ ) log, b) De-trended cone-tip resistance log ( $\Delta q_c$ ), de-trended with a best fit linear trend, c) Autocorrelation function (ACF) of the cone-tip resistance log.

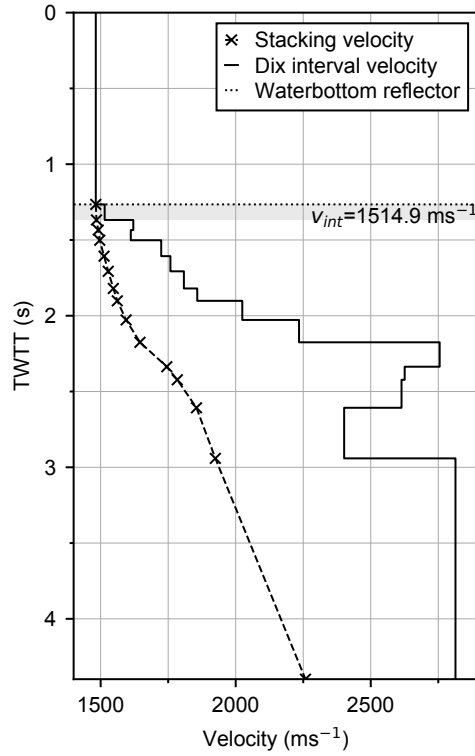

**Figure S3.** Picked NMO stacking velocities for a common mid-point gather from a multi-channel seismic reflection profile located close to the alongslope Black Sea sub-bottom profile (location in Fig. 1a). The water velocity is  $1480 \text{ ms}^{-1}$ , and the average Dix-converted interval velocity ( $v_{int}$ ) for 100 ms beneath the seafloor (shaded grey) is marked. ‘TWTT’ corresponds to two-way traveltime.

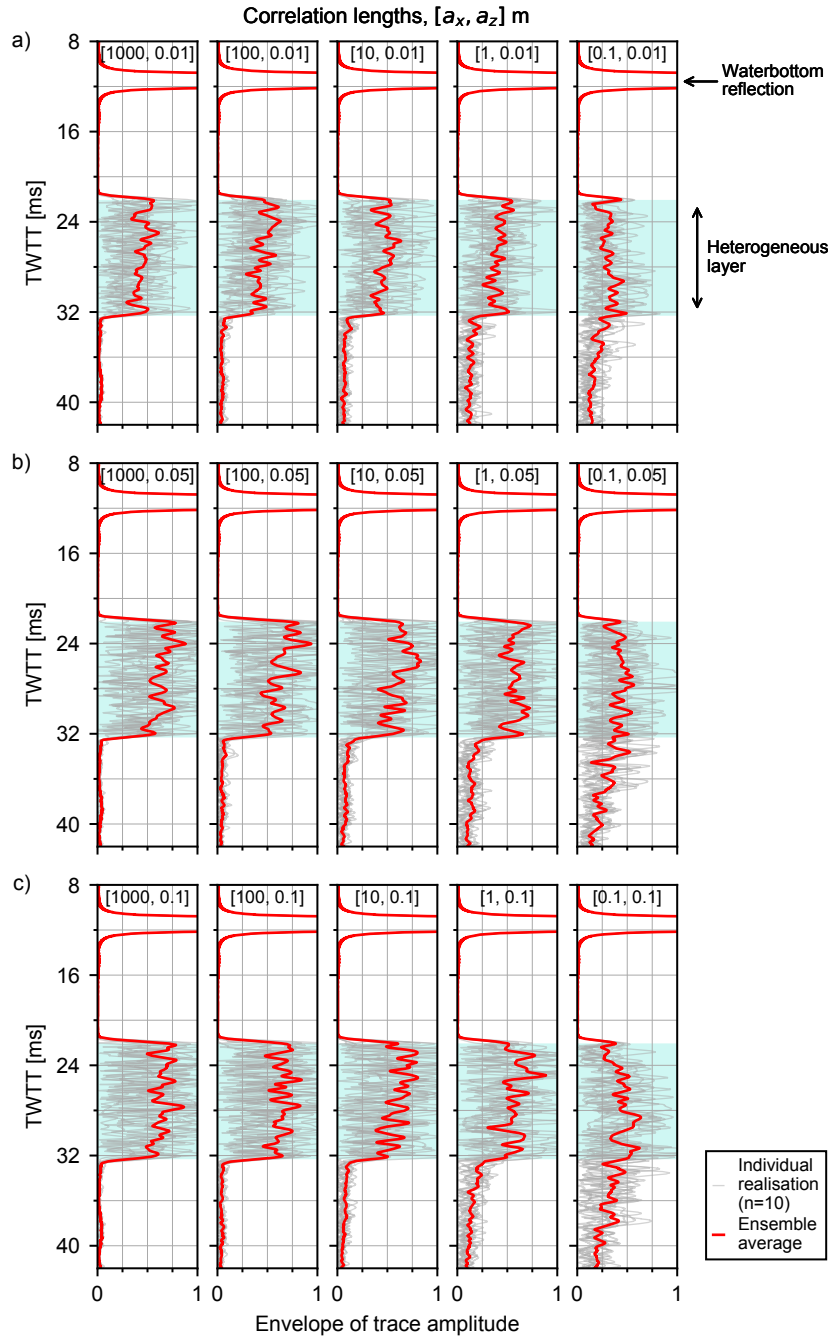

**Figure S4.** Envelope of trace amplitude for individual realisations (grey) and the RMS envelope of the single-source synthetic experiment for each unique set of correlation lengths (red) for a range of vertical correlation lengths  $a_z = \{0.01, 0.05, 0.1, 0.5, 1\}$  m (a-e) and lateral correlation lengths  $a_x = \{1000, 100, 10, 1, 0.1\}$  m (left to right). The two-way traveltime (TWTT) extent of the heterogeneous layer is shaded in blue. (cont.)

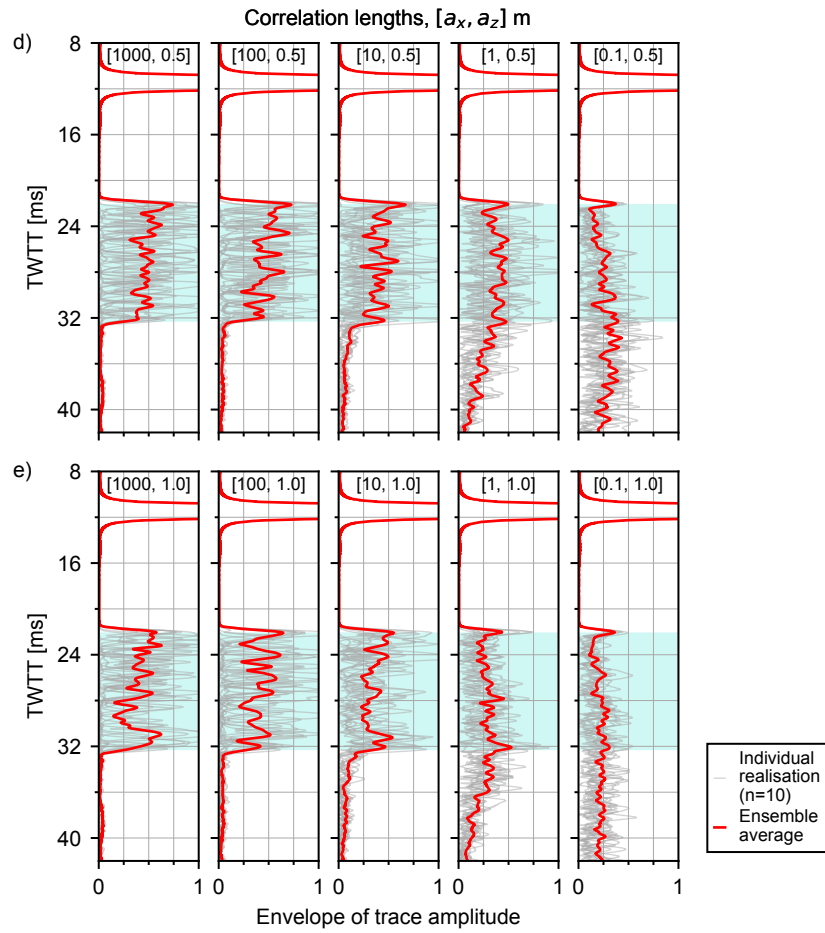

**Figure S4.**



Seed: 3021

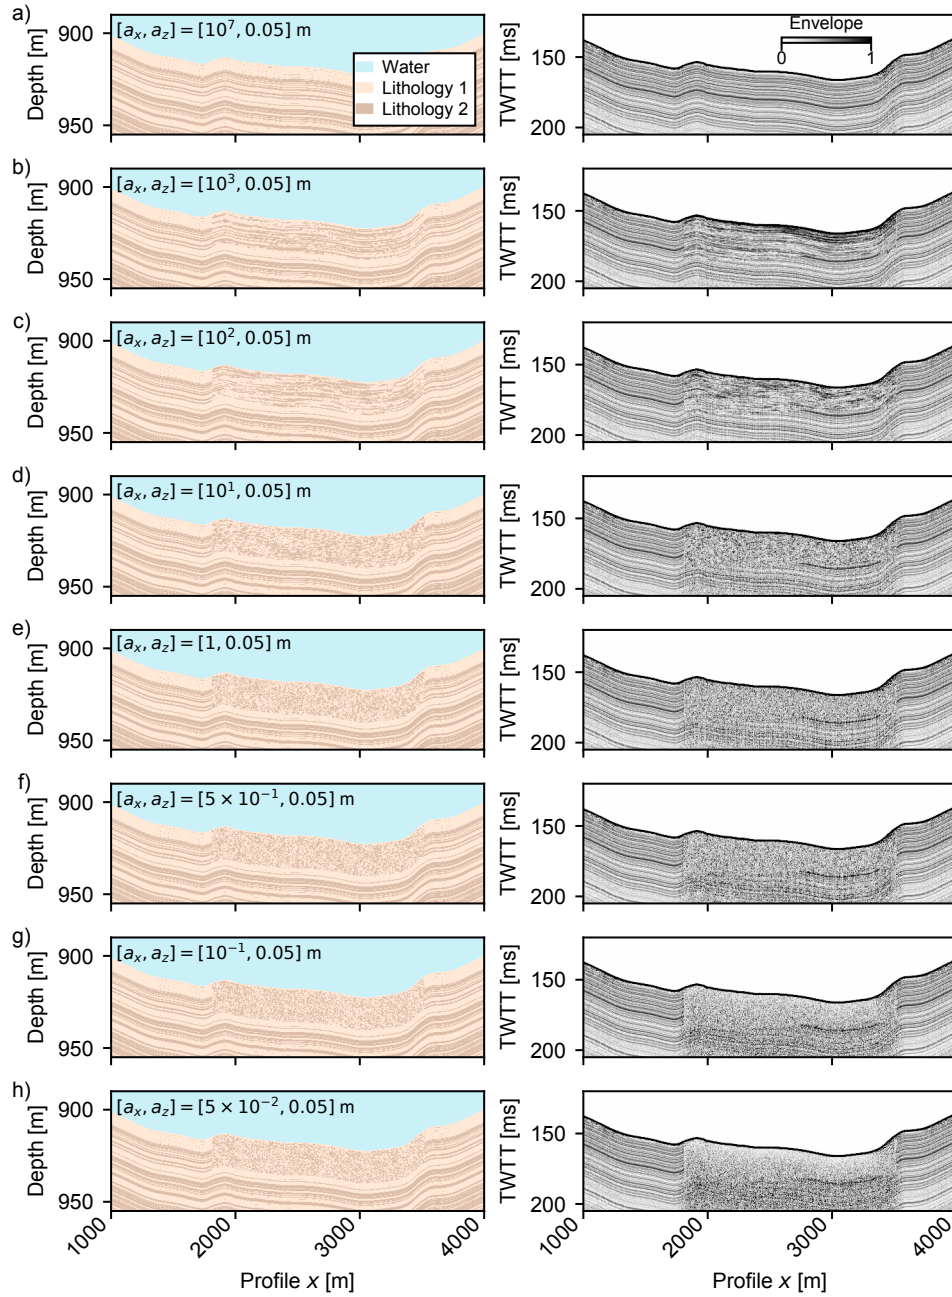

**Figure S5.** Realisations of the multi-source synthetic experiment models (left) and resulting synthetic sub-bottom profiles (right) for seed 3021, lateral scale lengths  $a_x = \{1 \times 10^7(\text{unfailed}), 1000, 100, 10, 1, 0.5, 0.1, 0.05\}$  (a-h) and vertical scale length  $a_z = 0.05$  m.

Seed: 3022

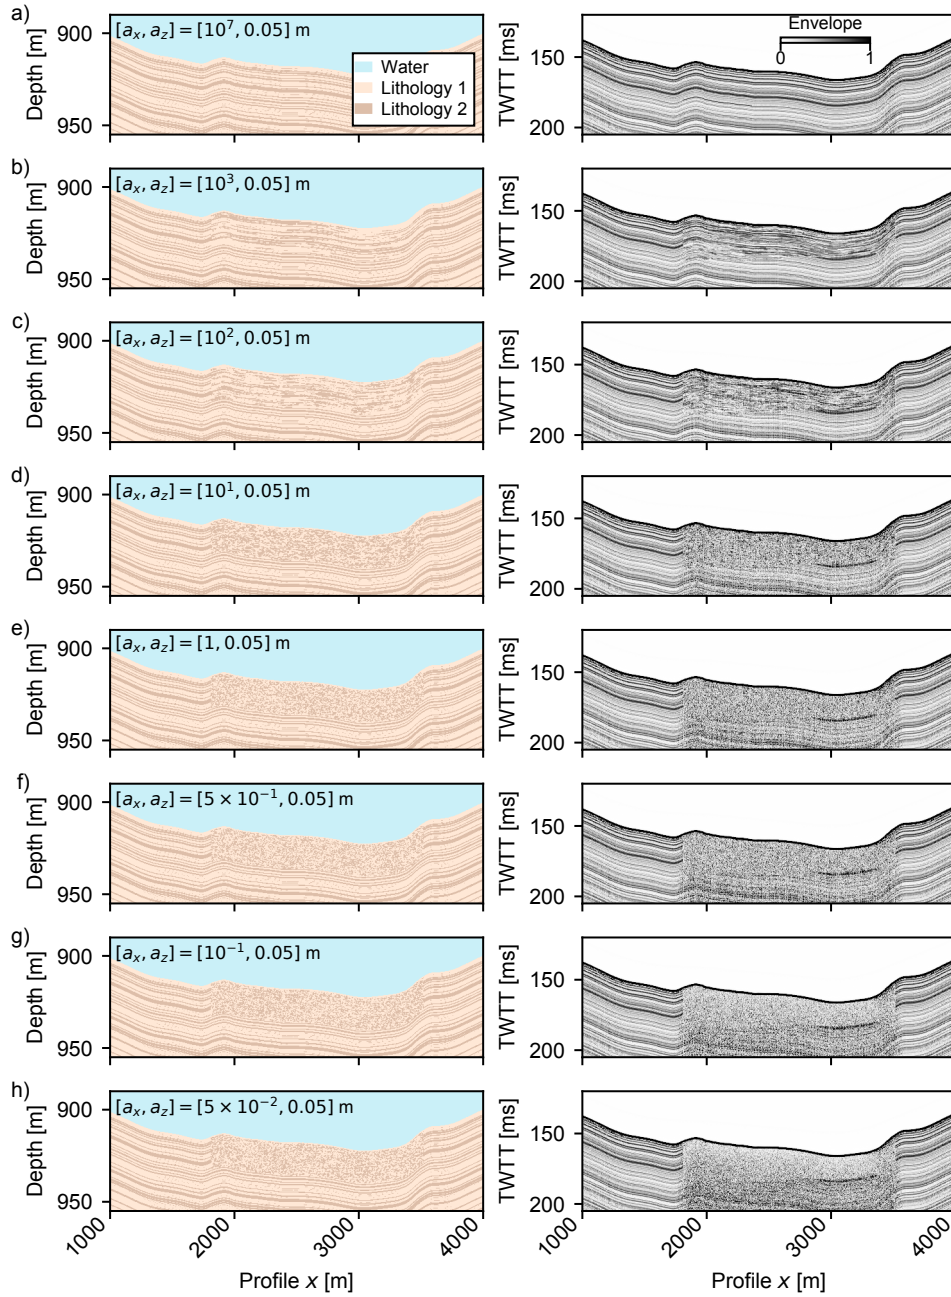

**Figure S6.** Realisations of the multi-source synthetic experiment models (left) and resulting synthetic sub-bottom profiles (right) for seed 3022, lateral scale lengths  $a_x = \{1 \times 10^7(\text{unfailed}), 1000, 100, 10, 1, 0.5, 0.1, 0.05\}$  (a-h) and vertical scale length  $a_z = 0.05$  m.

Seed: 3023

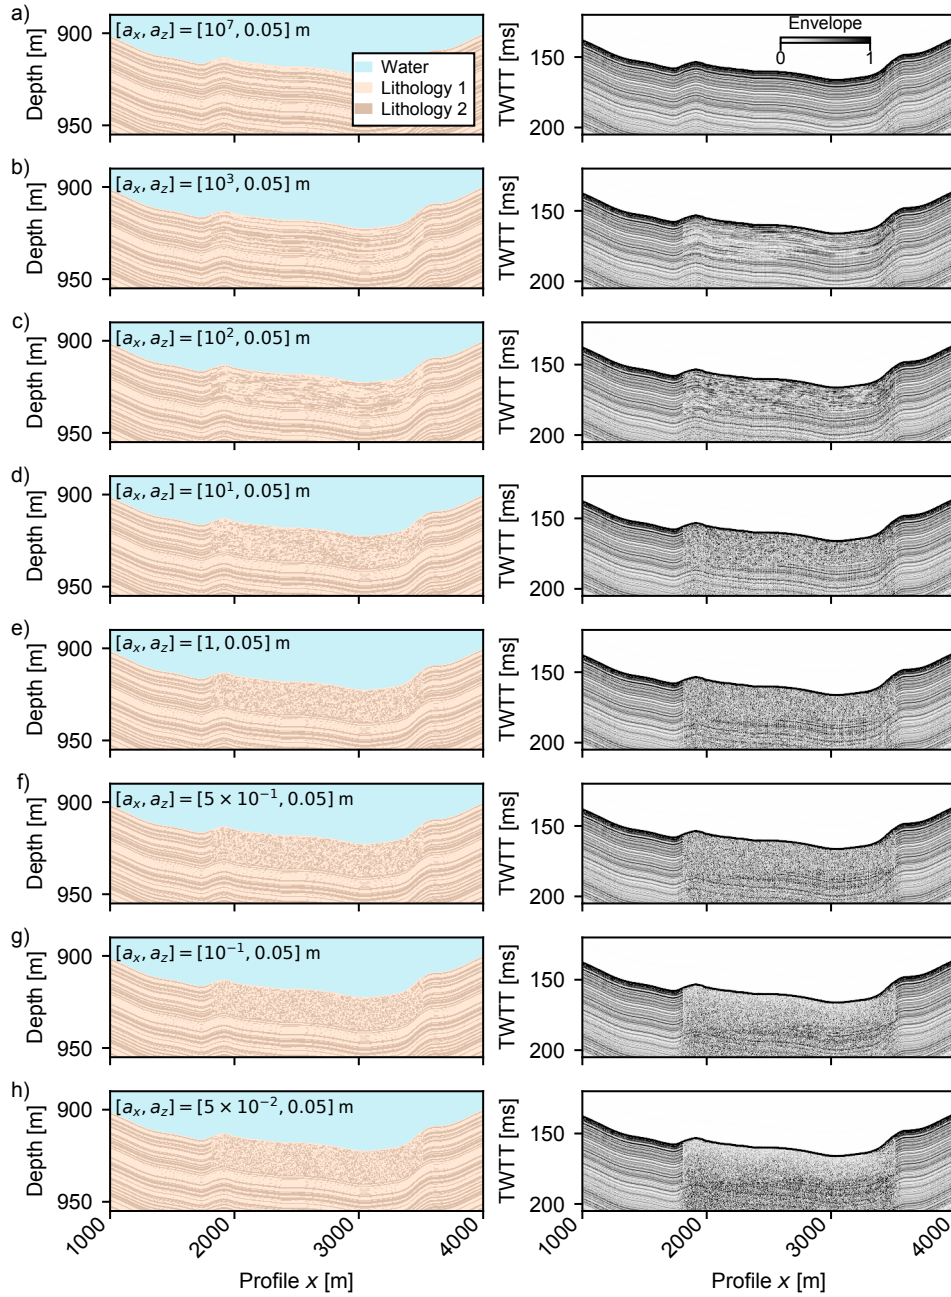

**Figure S7.** Realisations of the multi-source synthetic experiment models (left) and resulting synthetic sub-bottom profiles (right) for seed 3023, lateral scale lengths  $a_x = \{1 \times 10^7(\text{unfailed}), 1000, 100, 10, 1, 0.5, 0.1, 0.05\}$  (a-h) and vertical scale length  $a_z = 0.05$  m.

Seed: 3024

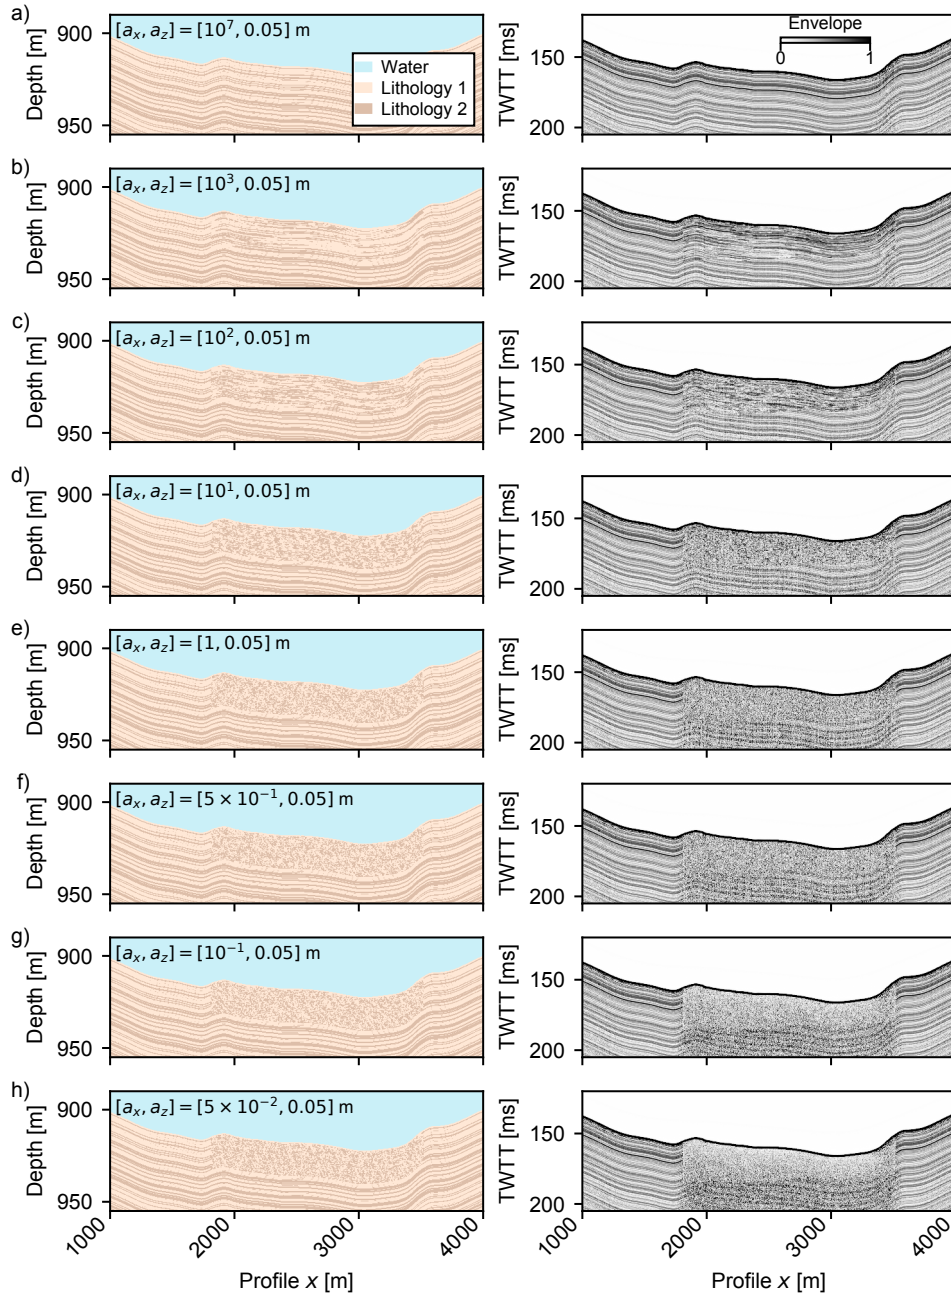

**Figure S8.** Realisations of the multi-source synthetic experiment models (left) and resulting synthetic sub-bottom profiles (right) for seed 3024, lateral scale lengths  $a_x = \{1 \times 10^7(\text{unfailed}), 1000, 100, 10, 1, 0.5, 0.1, 0.05\}$  (a-h) and vertical scale length  $a_z = 0.05$  m.

Seed: 3025

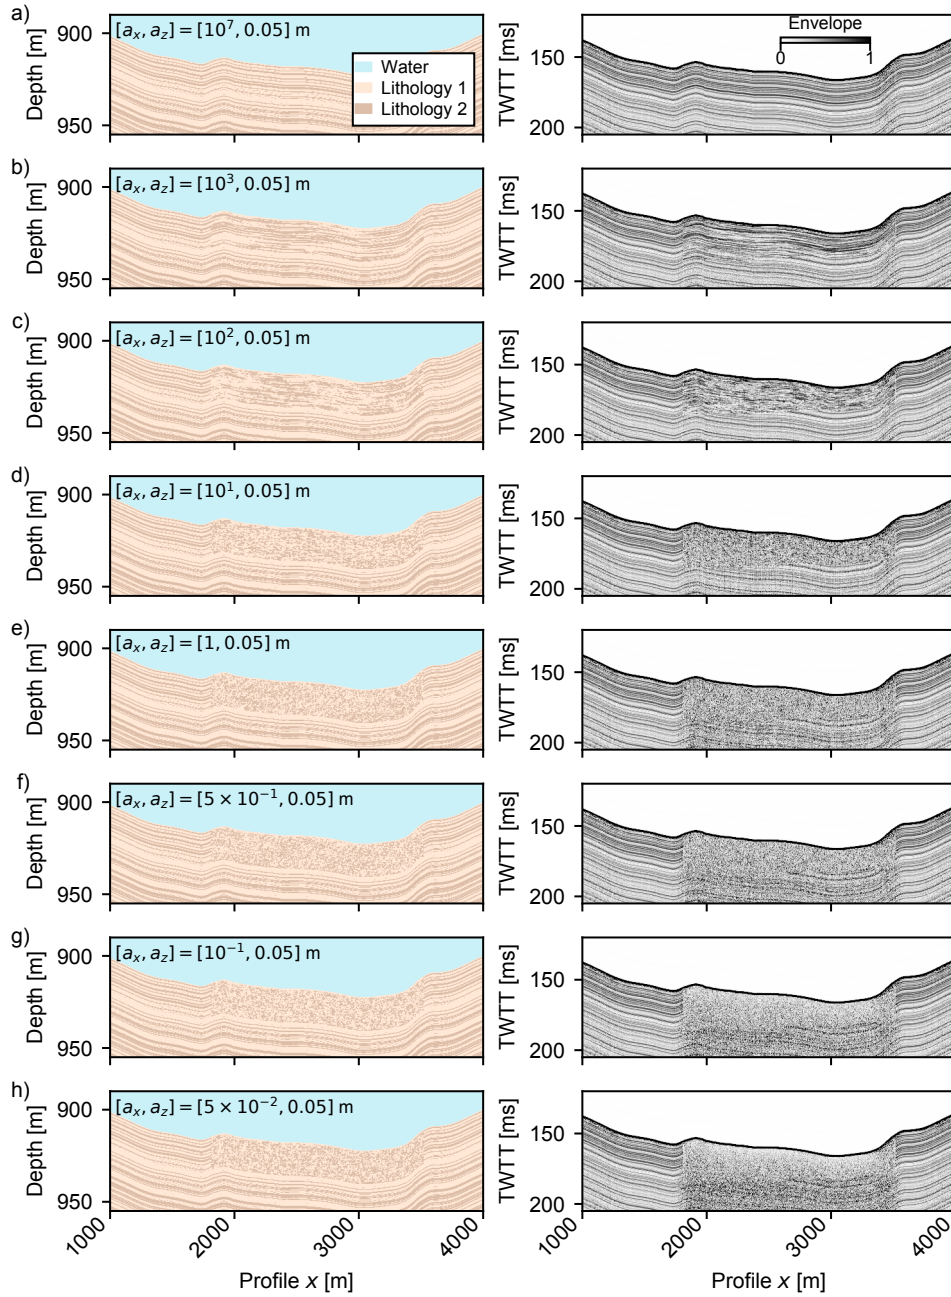

**Figure S9.** Realisations of the multi-source synthetic experiment models (left) and resulting synthetic sub-bottom profiles (right) for seed 3025, lateral scale lengths  $a_x = \{1 \times 10^7(\text{unfailed}), 1000, 100, 10, 1, 0.5, 0.1, 0.05\}$  (a-h) and vertical scale length  $a_z = 0.05$  m.

**Table S1.** Modelling parameters for the ‘low reflectivity’ single-source synthetic experiment, including the elastic parameters for the water layer and the two sediment lithologies. The model geometry is identical to the single-source experiment (Fig. 3).

| <b>Component lithologies</b>                  | P-wave velocity                      | S-wave velocity      | Density                |
|-----------------------------------------------|--------------------------------------|----------------------|------------------------|
| Water                                         | 1480 ms <sup>-1</sup>                | —                    | 1000 kgm <sup>-3</sup> |
| Lithology 1                                   | 1515 ms <sup>-1</sup>                | 379 ms <sup>-1</sup> | 1900 kgm <sup>-3</sup> |
| Lithology 2                                   | 1550 ms <sup>-1</sup>                | 388 ms <sup>-1</sup> | 1950 kgm <sup>-3</sup> |
| <b>Finite-difference modelling parameters</b> |                                      |                      |                        |
| Model dimensions                              | 40 × 40 m (1601 × 1601 grid points)  |                      |                        |
| Grid spacing                                  | 0.025 × 0.025 m                      |                      |                        |
| Timestep                                      | 0.0089 ms                            |                      |                        |
| Modelling time                                | 43.7 ms (4908 timesteps)             |                      |                        |
| Absorbing boundaries                          | Sponge layers on all four grid edges |                      |                        |
| Source wavelet                                | 1.5 kHz Ricker wavelet (zero-phase)  |                      |                        |

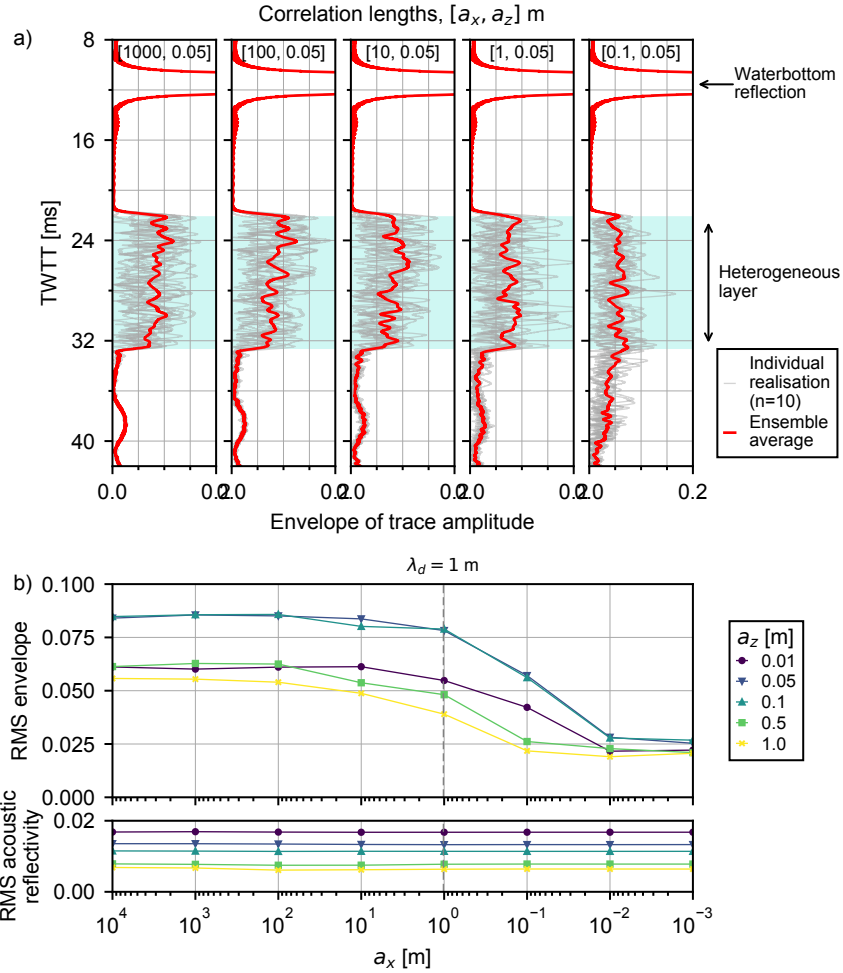

**Figure S10.** ‘Low reflectivity’ single-source synthetic experiment results. a) Envelope of trace amplitude for  $n = 10$  multiple realisations (grey) and the RMS envelope of all realisations (red) for fixed vertical correlation length  $a_z = 0.05$  m and lateral correlation lengths  $a_x = \{1000, 100, 10, 1, 0.1\}$  m (from left to right). The two-way traveltime (TWT) extent of the heterogeneous layer is shaded in blue. b) (Top) RMS envelope within the heterogeneous zone against lateral correlation length,  $a_x$ , grouped by vertical correlation length,  $a_z$ . (Bottom) RMS vertical incidence acoustic reflectivity within the heterogeneous zone.  $\lambda_d$  shows the dominant wavelength of the seismic source in the sediment layers. Modelling parameters are given in Table S1.

**Table S2.** Modelling parameters for the ‘high reflectivity’ single-source synthetic experiment, including the elastic parameters for the water layer and the two sediment lithologies. The model geometry is identical to the single-source experiment (Fig. 3).

| <b>Component lithologies</b>                  | P-wave velocity                      | S-wave velocity      | Density                |
|-----------------------------------------------|--------------------------------------|----------------------|------------------------|
| Water                                         | 1480 ms <sup>-1</sup>                | —                    | 1000 kgm <sup>-3</sup> |
| Lithology 1                                   | 1515 ms <sup>-1</sup>                | 379 ms <sup>-1</sup> | 1900 kgm <sup>-3</sup> |
| Lithology 2                                   | 1800 ms <sup>-1</sup>                | 450 ms <sup>-1</sup> | 2400 kgm <sup>-3</sup> |
| <b>Finite-difference modelling parameters</b> |                                      |                      |                        |
| Model dimensions                              | 40 × 40 m (1601 × 1601 grid points)  |                      |                        |
| Grid spacing                                  | 0.025 × 0.025 m                      |                      |                        |
| Timestep                                      | 0.0080 ms                            |                      |                        |
| Modelling time                                | 43.7 ms (5470 timesteps)             |                      |                        |
| Absorbing boundaries                          | Sponge layers on all four grid edges |                      |                        |
| Source wavelet                                | 1.5 kHz Ricker wavelet (zero-phase)  |                      |                        |



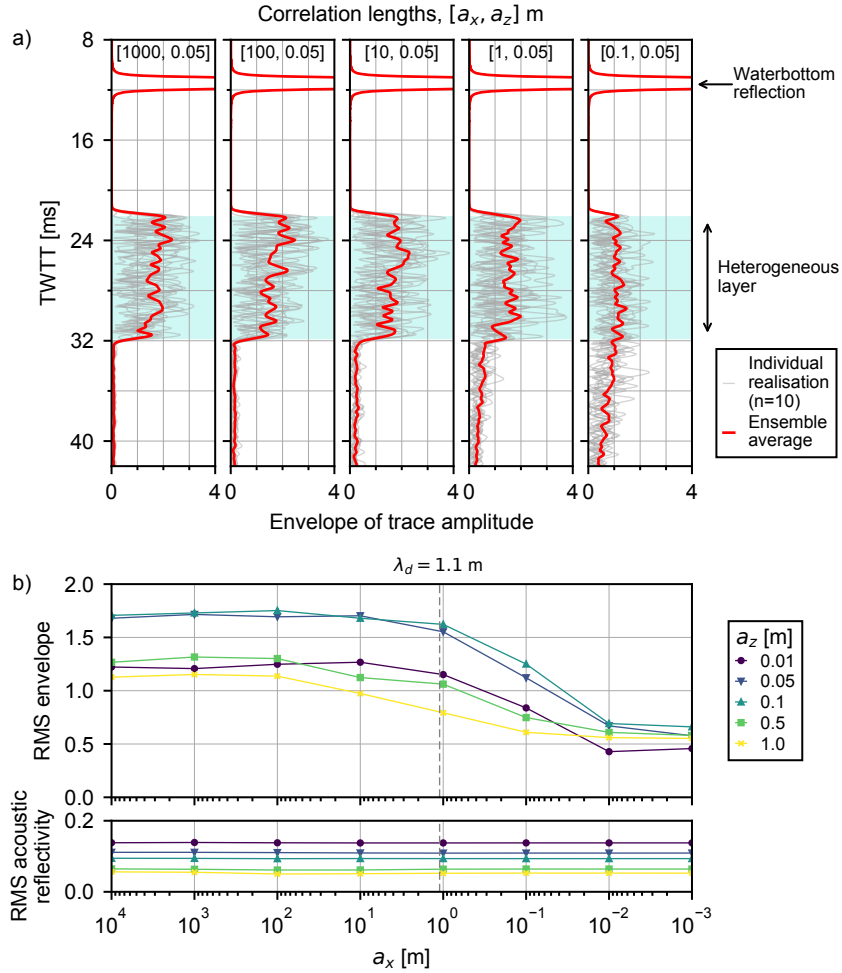

**Figure S11.** ‘High reflectivity’ single-source synthetic experiment results. a) Envelope of trace amplitude for  $n = 10$  multiple realisations (grey) and the RMS envelope of all realisations (red) for fixed vertical correlation length  $a_z = 0.05$  m and lateral correlation lengths  $a_x = \{1000, 100, 10, 1, 0.1\}$  m (from left to right). The two-way traveltime (TWTT) extent of the heterogeneous layer is shaded in blue. b) (Top) RMS envelope within the heterogeneous zone against lateral correlation length,  $a_x$ , grouped by vertical correlation length,  $a_z$ . (Bottom) RMS vertical incidence acoustic reflectivity within the heterogeneous zone.  $\lambda_d$  shows the dominant wavelength of the seismic source in the sediment layers. Modelling parameters are given in Table S2.

**Table S3.** Modelling parameters for the ‘far source’ single-source synthetic experiment, including the elastic parameters for the water layer and the two sediment lithologies.

| <b>Component lithologies</b> | P-wave velocity       | S-wave velocity      | Density                |
|------------------------------|-----------------------|----------------------|------------------------|
| Water                        | 1480 ms <sup>-1</sup> | —                    | 1000 kgm <sup>-3</sup> |
| Lithology 1                  | 1515 ms <sup>-1</sup> | 379 ms <sup>-1</sup> | 1900 kgm <sup>-3</sup> |
| Lithology 2                  | 1650 ms <sup>-1</sup> | 413 ms <sup>-1</sup> | 2100 kgm <sup>-3</sup> |

  

| <b>Finite-difference modelling parameters</b> |                                     |
|-----------------------------------------------|-------------------------------------|
| Model dimensions                              | 80 × 80 m (3201 × 3201 grid points) |
| Grid spacing                                  | 0.025 × 0.025 m                     |
| Timestep                                      | 0.0089 ms                           |
| Modelling time                                | 97.0 ms (10915 timesteps)           |
| Seismic source                                | 1.5 kHz Ricker wavelet (zero-phase) |

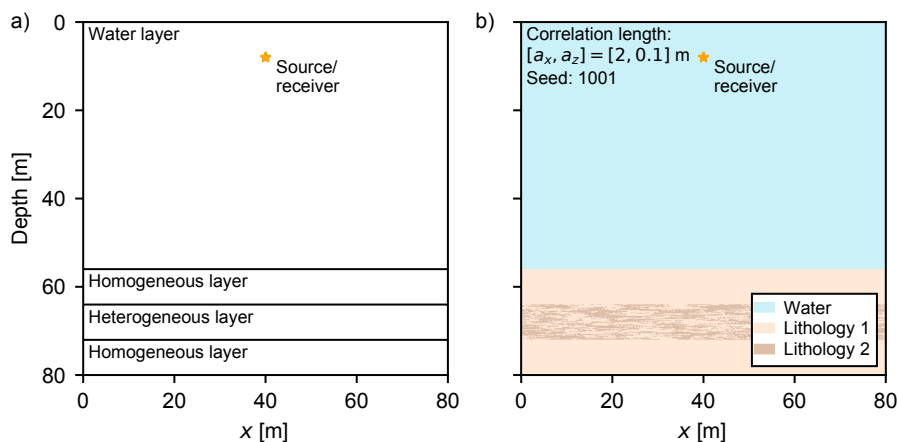

**Figure S12.** ‘Far source’ single-source synthetic experiment. a) Model geometry. The coincident seismic source and receiver (yellow star) is located within the water layer, 56 m from the top of the heterogeneous layer. b) A single realisation of the model showing the spatial distribution of Lithology 1 and Lithology 2 within the heterogeneous layer. Modelling parameters are listed in Table S3.

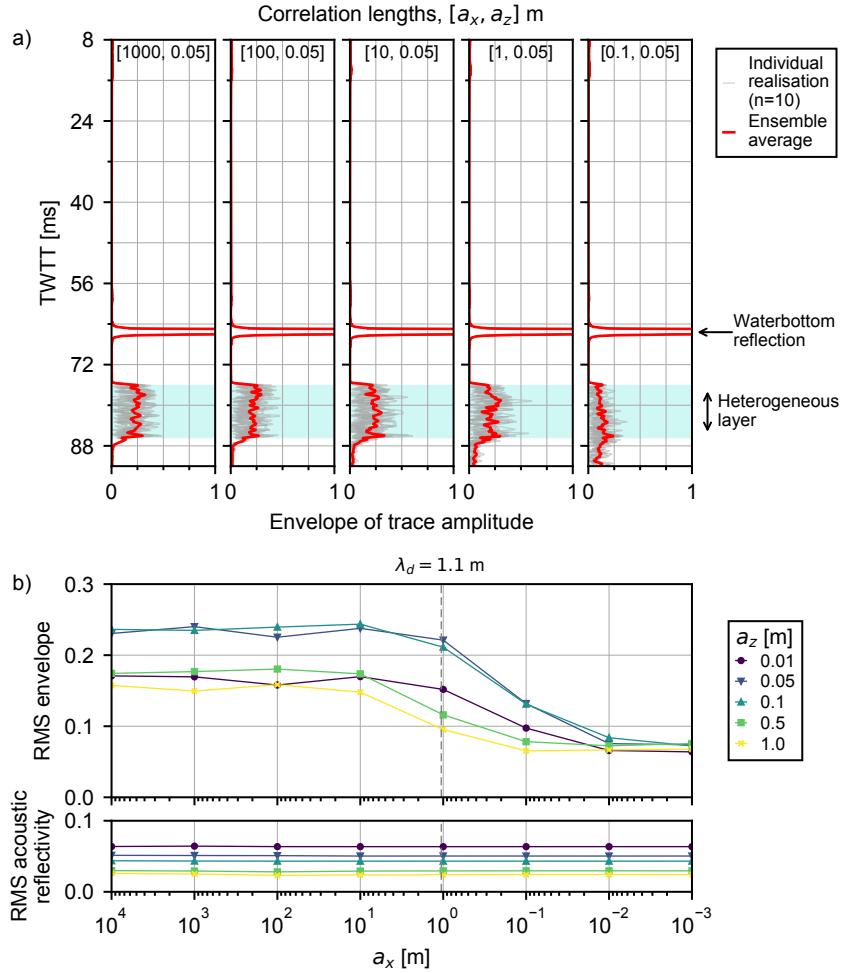

**Figure S13.** ‘Far source’ single-source synthetic experiment results. a) Envelope of trace amplitude for  $n = 10$  multiple realisations (grey) and the RMS envelope of all realisations (red) for fixed vertical correlation length  $a_z = 0.05$  m and lateral correlation lengths  $a_x = \{1000, 100, 10, 1, 0.1\}$  m (from left to right). The two-way traveltime (TWTT) extent of the heterogeneous layer is shaded in blue. b) (Top) RMS envelope within the heterogeneous zone against lateral correlation length,  $a_x$ , grouped by vertical correlation length,  $a_z$ . (Bottom) RMS vertical incidence acoustic reflectivity within the heterogeneous zone.  $\lambda_d$  shows the dominant wavelength of the seismic source in the sediment layers. Modelling parameters are given in Table S3 and the model geometry is shown in Fig. S12.

**Table S4.** Modelling parameters for the ‘low Poisson’s ratio’ single-source synthetic experiment, including the elastic parameters for the water layer and the two sediment lithologies. Poisson’s ratio  $\nu = 0.33$  in the sediment layers, corresponding to  $v_P/v_S = 2$ .

| <b>Component lithologies</b>                  | P-wave velocity                      | S-wave velocity      | Density                |
|-----------------------------------------------|--------------------------------------|----------------------|------------------------|
| Water                                         | 1480 ms <sup>-1</sup>                | —                    | 1000 kgm <sup>-3</sup> |
| Lithology 1                                   | 1515 ms <sup>-1</sup>                | 758 ms <sup>-1</sup> | 1900 kgm <sup>-3</sup> |
| Lithology 2                                   | 1650 ms <sup>-1</sup>                | 825 ms <sup>-1</sup> | 2100 kgm <sup>-3</sup> |
| <b>Finite-difference modelling parameters</b> |                                      |                      |                        |
| Model dimensions                              | 40 × 40 m (1601 × 1601 grid points)  |                      |                        |
| Grid spacing                                  | 0.025 × 0.025 m                      |                      |                        |
| Timestep                                      | 0.0081 ms                            |                      |                        |
| Modelling time                                | 43.7 ms (5401 timesteps)             |                      |                        |
| Absorbing boundaries                          | Sponge layers on all four grid edges |                      |                        |
| Source wavelet                                | 1.5 kHz Ricker wavelet (zero-phase)  |                      |                        |

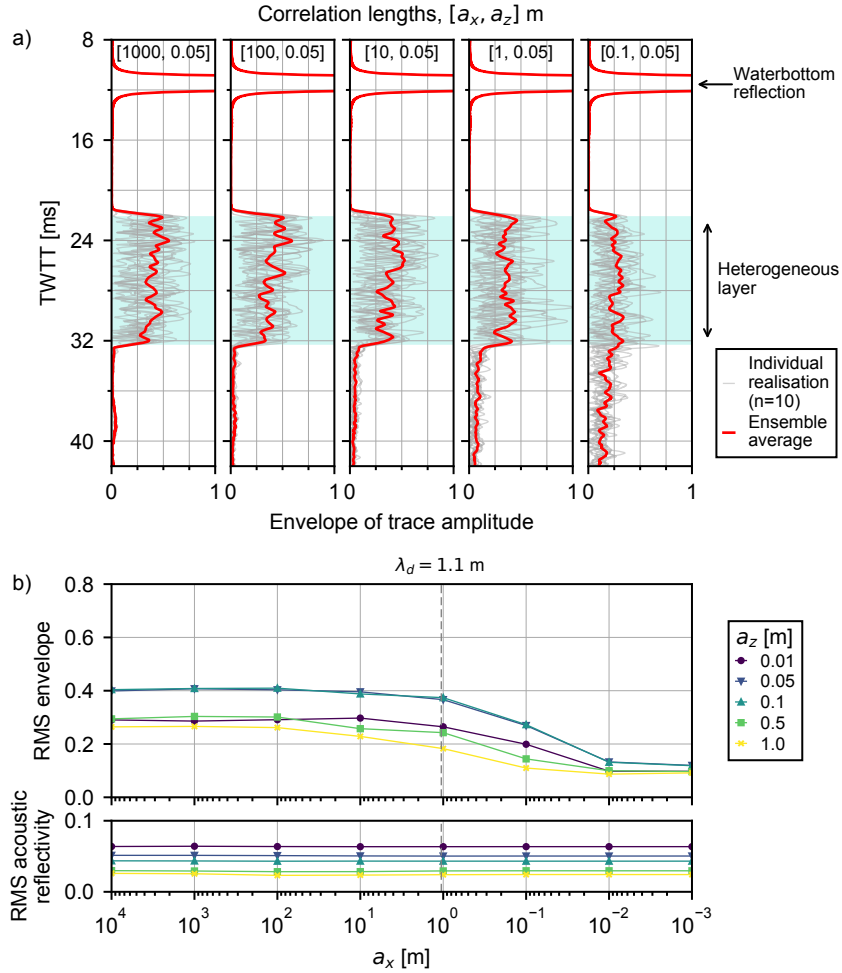

**Figure S14.** ‘Low Poisson’s ratio’ single-source synthetic experiment results, where  $\nu = 0.33$  in the sediment layers. a) Envelope of trace amplitude for  $n = 10$  multiple realisations (grey) and the RMS envelope of all realisations (red) for fixed vertical correlation length  $a_z = 0.05$  m and lateral correlation lengths  $a_x = \{1000, 100, 10, 1, 0.1\}$  m (from left to right). The two-way traveltime (TWTT) extent of the heterogeneous layer is shaded in blue. b) (Top) RMS envelope within the heterogeneous zone against lateral correlation length,  $a_x$ , grouped by vertical correlation length,  $a_z$ . (Bottom) RMS vertical incidence acoustic reflectivity within the heterogeneous zone.  $\lambda_d$  shows the dominant wavelength of the seismic source in the sediment layers. Modelling parameters are given in Table S4.

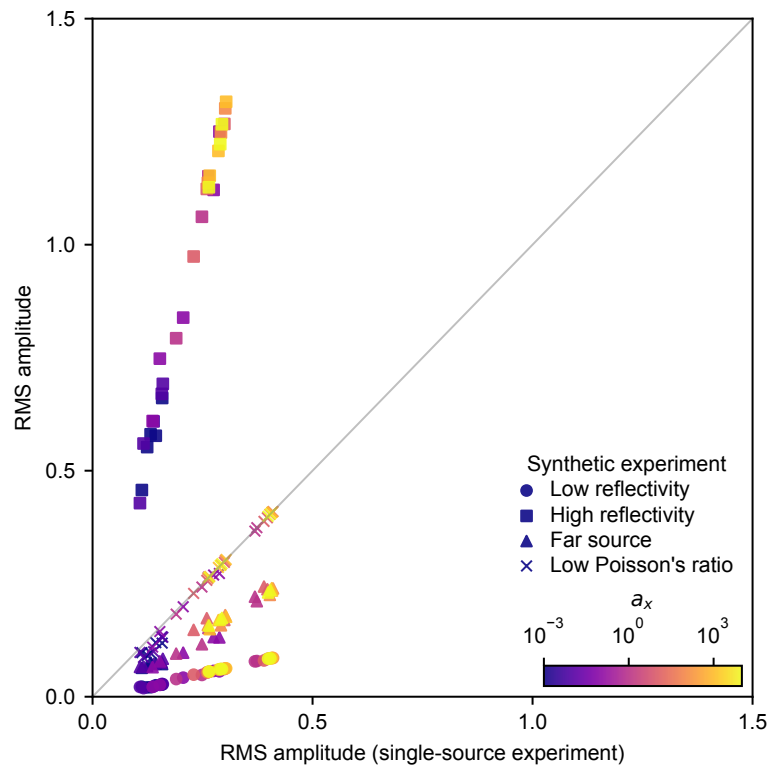

**Figure S15.** Cross-plot of the average RMS amplitudes within the heterogeneous zone, between the single-source experiment (Fig. 4) and the ‘low reflectivity’ (Fig. S10), ‘high reflectivity’ (Fig. S11), ‘far source’ (Fig. S13) and ‘low Poisson’s ratio’ (Fig. S14) synthetic experiments.

**Table S5.** Approximate computational runtimes for the single-source and multi-source experiments. Models were run on an HPC cluster with 48-core nodes ( $2 \times 24$ -core Intel Xeon Platinum 8276-8276L) and 384 GB memory. Quoted CPU times are per logical CPU core. For the multi-source experiment, the runtime of each shot represents the average computation time for each sub-model, as the exact sub-model grid size depends on the source location within the global model (Section 3.2). Modelling runs for sub-models that are identical with changing  $a_x$  (i.e., sub-models that do not overlap the MTD zone) are re-used, resulting in approximately 30% reduction in compute time compared to modelling all sub-models.

| Synthetic experiment       | CPU time (single shot) | Number of shots                         | CPU time (total) |
|----------------------------|------------------------|-----------------------------------------|------------------|
| Single-source              |                        |                                         |                  |
| ‘Low reflectivity’         | 12 mins                | 400                                     | 80 hours         |
| ‘High reflectivity’        |                        |                                         |                  |
| ‘Low Poisson’s ratio’      |                        |                                         |                  |
| ‘Far source’ single-source | 1 hour                 | 400                                     | 420 hours        |
| Multi-source               | 10 mins                | 37 224 modelled (+ 22 816 cached shots) | 6 200 hours      |
